# Supplementary material for: Whole-Genome Sequencing Suggests Schizophrenia Risk Mechanisms in Humans with 22q11.2 Deletion Syndrome
Source: PubMed Central journal article supplement (PMC4632064; doi:10.1534/g3.115.021345), 2015-09-16
Supplement: supp_g3.115.021345_FigureS2.pdf [file supp_g3.115.021345_FigureS2.pdf]

Figure S2

SNP p-value cutoff =  $10^{-3}$

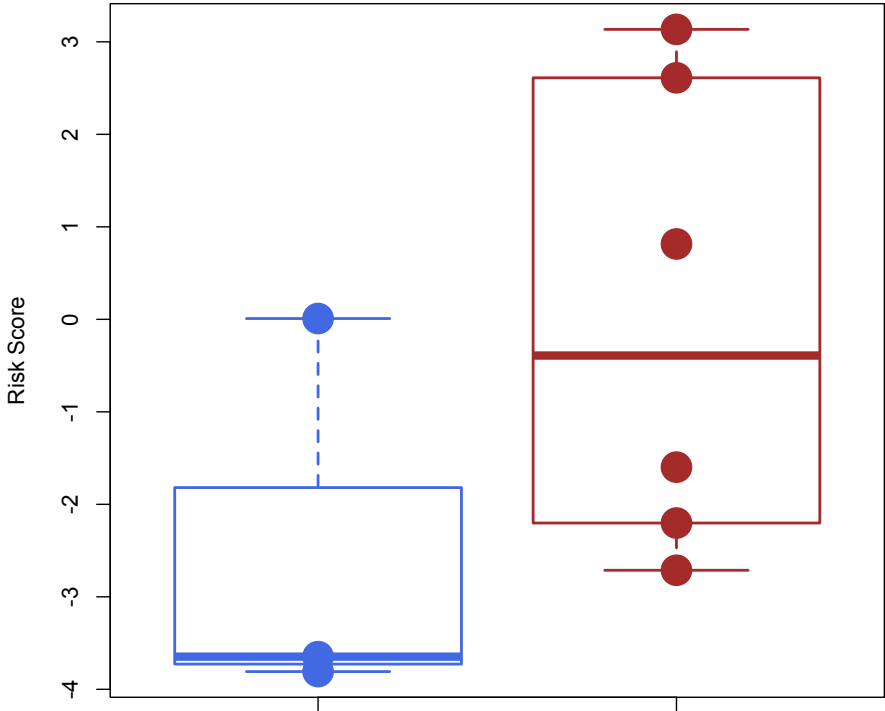

SNP p-value cutoff =  $10^{-4}$

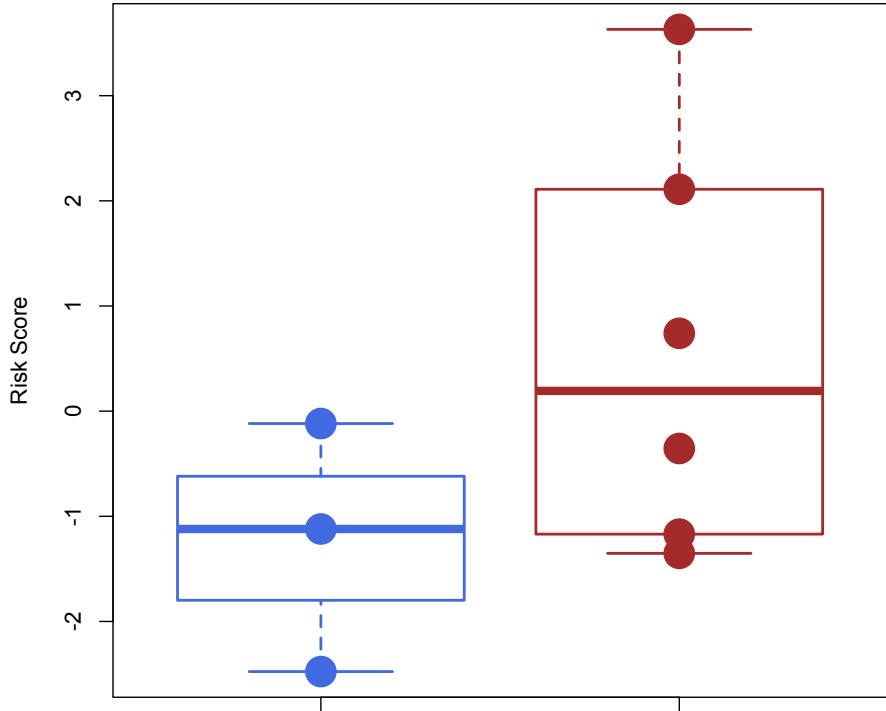

**Figure S2.** Distribution boxplots of subjects' polygenic risk scores for the schizophrenia (brown outline) and non-psychotic (blue outline) groups, using the SNPs at association p-value cutoff of 0.001 ( $10^{-3}$ ) and 0.0001 ( $10^{-4}$ ). Please see Methods for details.
